# Supplementary material for: A machine learning framework for the prediction of chromatin folding in Drosophila using epigenetic features
Source: PubMed Central journal article supplement (PMC7924456; doi:10.7717/peerj-cs.307), 2020-11-30

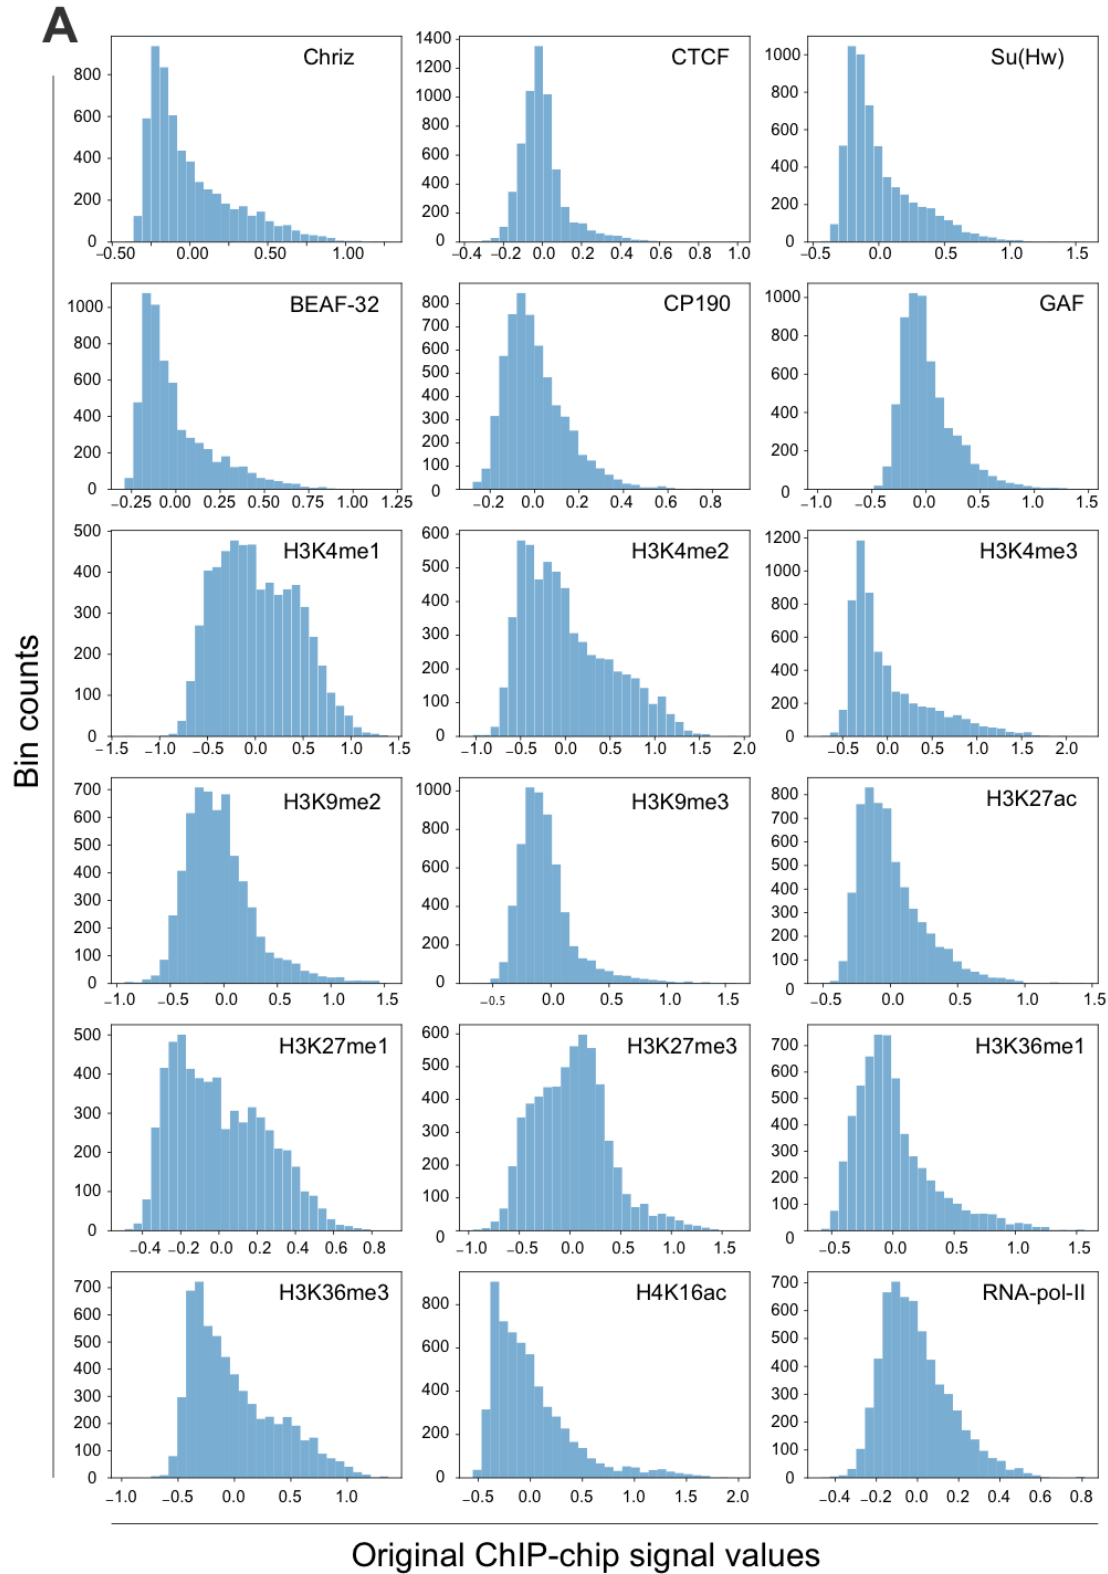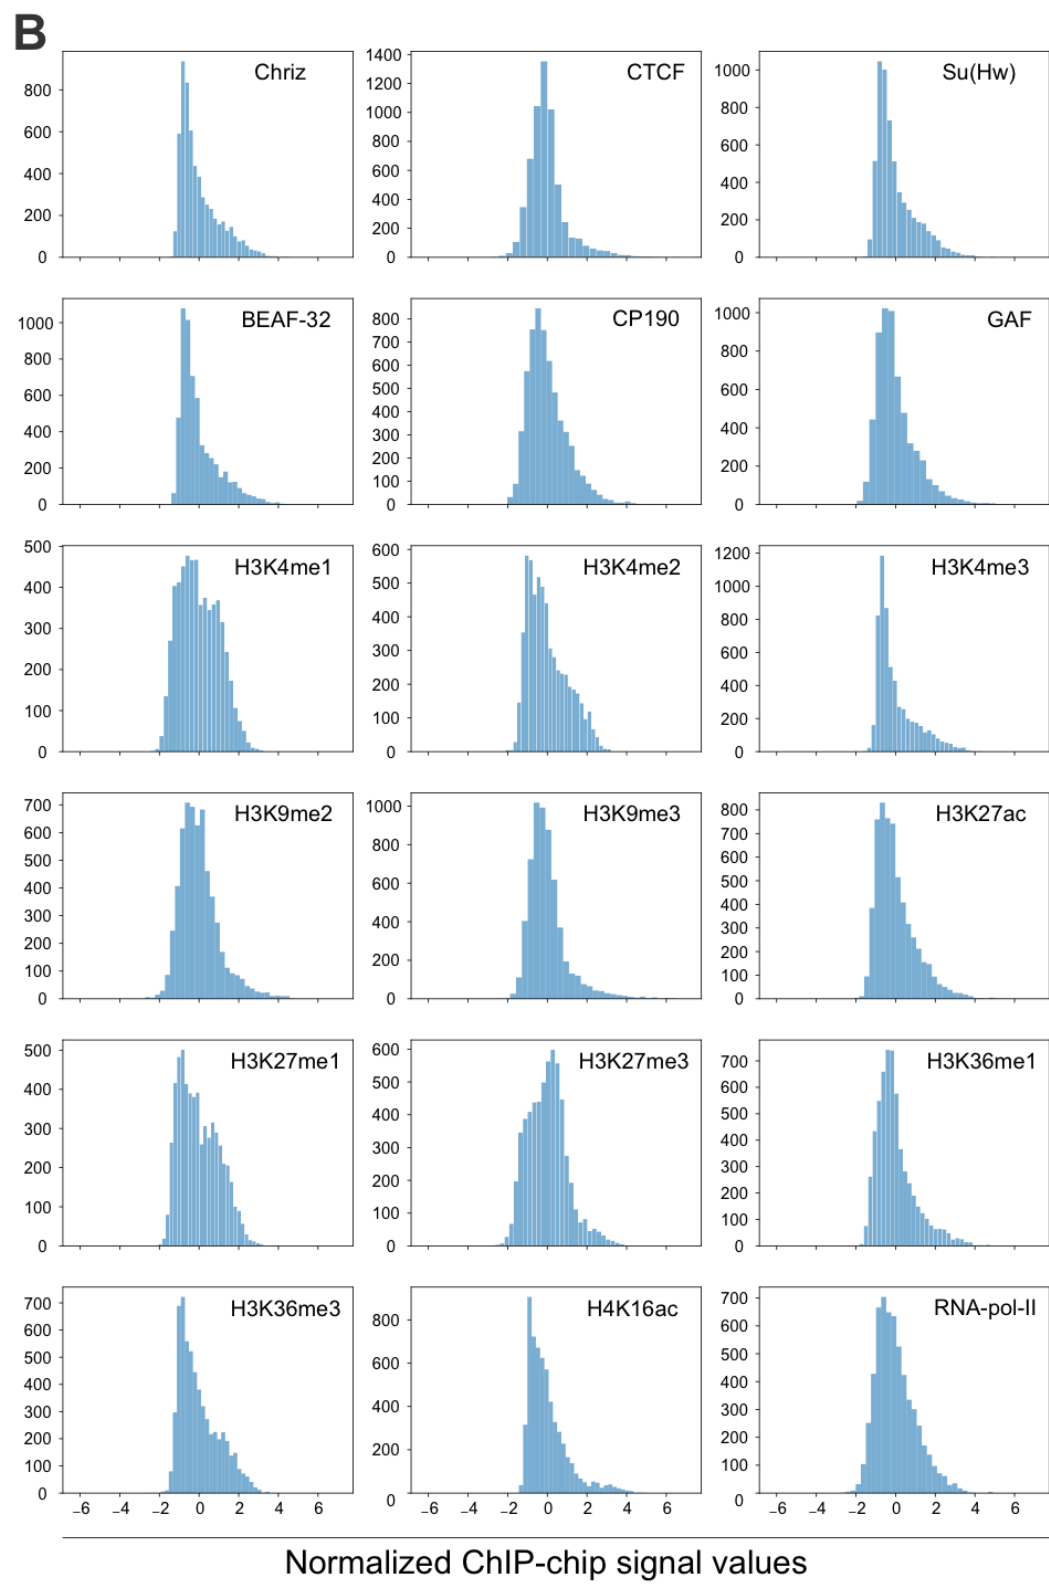

Supplement: peerj-cs-06-307-s002.pdf [file peerj-cs-06-307-s002.pdf]
