# Supplementary material for: A machine learning framework for the prediction of chromatin folding in Drosophila using epigenetic features
Source: PubMed Central journal article supplement (PMC7924456; doi:10.7717/peerj-cs.307), 2020-11-30
Supplement: peerj-cs-06-307-s003.pdf [file peerj-cs-06-307-s003.pdf]

**Table 1.** The modENCODE IDs of chromatin factors for three selected *Drosophila* cell lines.

| NAME              | MODENCODE IDs |       |          |
|-------------------|---------------|-------|----------|
|                   | SCHNEIDER-2   | KC167 | DMBG3-c2 |
| CHRIZ             | 279           | 277   | 275      |
| CTCF              | 3749          | 3749  | 3671     |
| SU(HW)            | 5147          | 3801  | 3717     |
| BEAF-32           | 922           | 3745  | 3663     |
| CP190             | 925           | 3748  | 3666     |
| GAF               | 3753          | 3753  | 2651     |
| H3K4ME1           | 3760          | 5138  | 2653     |
| H3K4ME2           | 965           | 4935  | 2654     |
| H3K4ME3           | 3761          | 5141  | 967      |
| H3K9ME2           | 311           | 938   | 310      |
| H3K9ME3           | 4183          | 3013  | 312      |
| H3K27AC           | 3757          | 3757  | 295      |
| H3K27ME1          | 3943          | 3942  | 3941     |
| H3K27ME3          | 298           | 5136  | 297      |
| H3K36ME1          | 3170          | 3003  | 299      |
| H3K36ME3          | 303           | 302   | 301      |
| H4K16AC           | 320           | 318   | 316      |
| RNA-POLYMERASE-II | 329           | 328   | 950      |
